# Supplementary material
Source: PubMed Central journal article supplement (PMC4669550)
Supplement: supp_eru530_jexbot127274_file001.pdf [file supp_eru530_jexbot127274_file001.pdf]

**GhCFE1A, a dynamic linker between ER network and actin cytoskeleton, plays an important role in cotton fiber cell initiation and elongation**

Fenni Lv<sup>1</sup>, Haihai Wang<sup>1</sup>, Xinyu Wang<sup>2</sup>, Libo Han<sup>3</sup>, Yiping Ma<sup>3</sup>, Sen Wang<sup>1</sup>,  
Zhidi Feng<sup>3</sup>, Xiaowei Niu<sup>1</sup>, Caiping Cai<sup>1</sup>, Zhaosheng Kong<sup>3</sup>, Tianzhen Zhang<sup>1</sup>,  
Wangzhen Guo<sup>1,\*</sup>

## Supplementary data

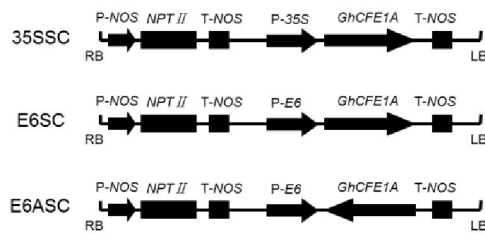

**Supplementary Fig. S1.** Constructions of sense and antisense expression vectors of *GhCFE1A*.

35SSC, *35S*-sense-*GhCFE1A* expression vector; E6SC, *E6*-sense-*GhCFE1A* expression vector; E6ASC, *E6*-antisense-*GhCFE1A* expression vector; RB, right border repeat; P-*NOS*, nopaline synthase gene promoter; *NPTII*, neomycin phosphotransferase II gene; P-*35S*, the cauliflower mosaic virus (CaMV) 35S promoter; P-*E6*, *GhE6* promoter; *GhCFE1A*: cotton fiber expressed protein gene; LB: left border repeat.

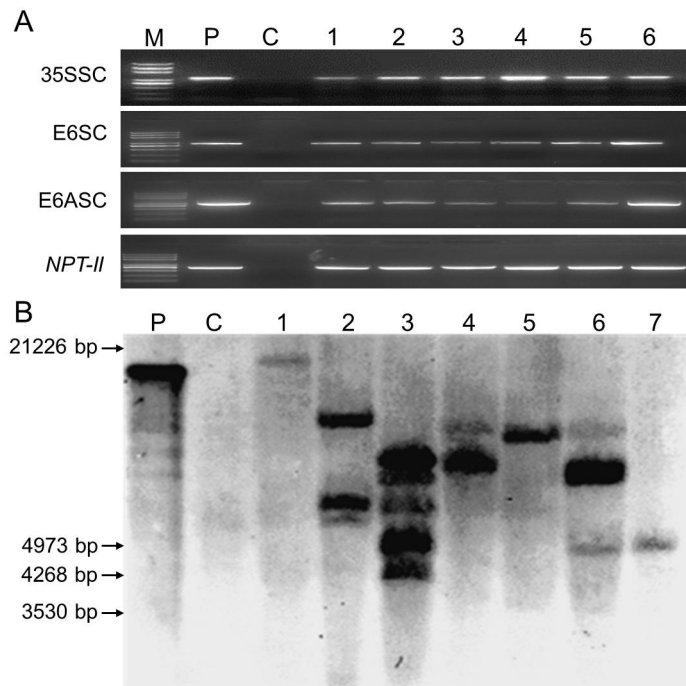

**Supplementary Fig. S2.** Molecular confirmation of the independent transgenic lines.

(A) PCR analysis of transgenic plants to determine the *NPTII*, *35S-sense-GhCFE1A* (35SSC), *E6-sense-GhCFE1A* (E6SC) and *E6-antisense-GhCFE1A* (E6ASC). M, molecular weight marker; P, positive control; C, non-transformed plant; 1-6, transgenic plants.

(B) Southern blot analysis of independent T3 transgenic lines. Genomic DNA was digested with *EcoR* I and hybridized with a 0.75-kb fragment of the *NPTII*.

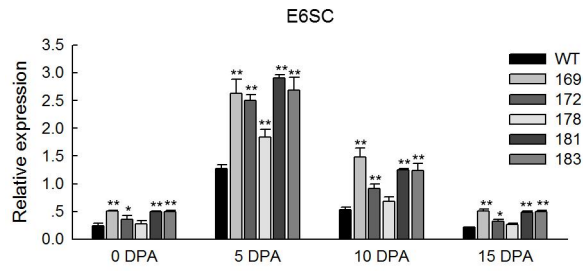

**Supplementary Fig. S3.** *GhCFE1* expression in ovules and developing fibers of E6SC transgenic cotton.

Quantitative RT-PCR (qRT-PCR) measurements of *GhCFE1* transcripts in 0 DPA ovules and 5 - 15 DPA fibers of the wild-type (WT) and E6SC transgenic (lines 169, 172, 178, 181, and 183) plants. Error bars represent standard deviation of triplicate experiments, and *His3* was used as an internal control (\* $P < 0.05$ , \*\* $P < 0.01$ , by Student's *t*-test).

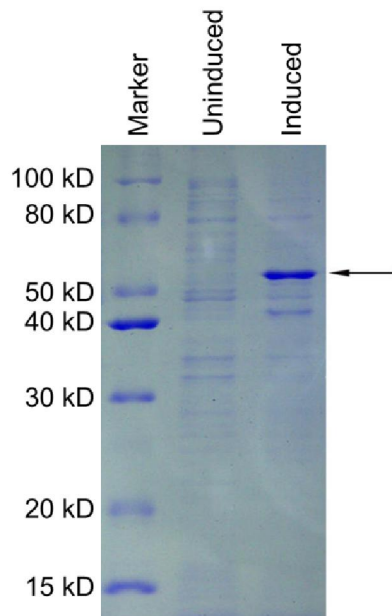

**Supplementary Fig. S4.** Sodium dodecyl sulfate-polyacrylamide gel (SDS-PAGE) analysis of GhCFE1A recombination protein in *Escherichia coli*.

The strain of *E. coli* carried a plasmid of pET-30a (+)-*GhCFE1A*, with the *GhCFE1A* gene placed under the control of the isopropylthio- $\beta$ -galactoside (IPTG)-inducible promoter. Induced by IPTG for 4 hours, a new protein band indicated by the black arrow, GhCFE1A recombination protein, appeared on the SDS-PAGE gel.

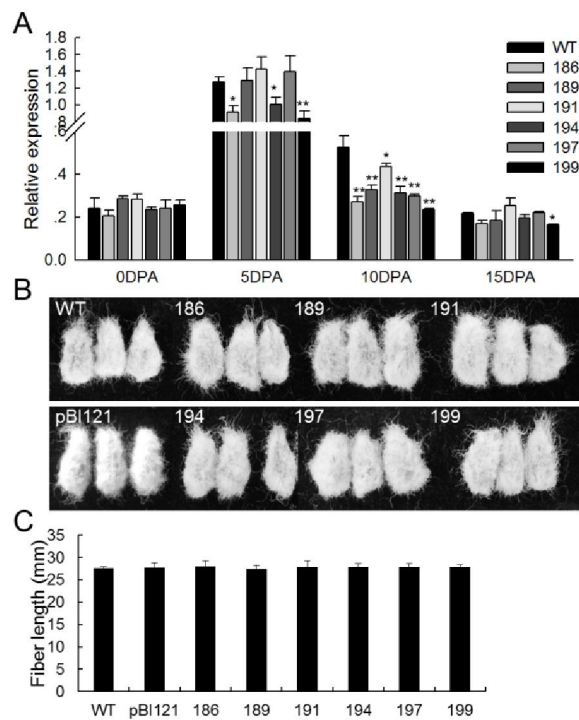

**Supplementary Fig. S5.** Inhibition of *GhCFE1* in cotton exhibits no obvious phenotype changes.

(A) qRT-PCR analysis of *GhCFE1* transcripts in 0 DPA ovules, 5 – 15 DPA fibers of wild-type (WT) and *GhCFE1*-knockdown transgenic cotton lines (186, 189, 191, 194, 197, and 199). Error bars represent standard deviation of triplicate experiments, and *His3* was used as an internal control (\* $P < 0.05$ , \*\* $P < 0.01$ , by Student's *t*-test).

(B) Unaltered phenotype of fuzz fiber initials in *GhCFE1*-knockdown T3 transgenic cotton lines (186, 189, 191, 194, 197, and 199), comparing with the wild-type and null control (pBI121) plants. The number of the fiber initials counted based on the SEM images existed no difference either and listed in Supplementary table S2.

(C) Average fiber length from wild-type, pBI121 control and *GhCFE1*-knockdown transgenic plants (lines 186, 189, 191, 194, 197, and 199). Error bars indicate standard deviation of triplicate experiments.

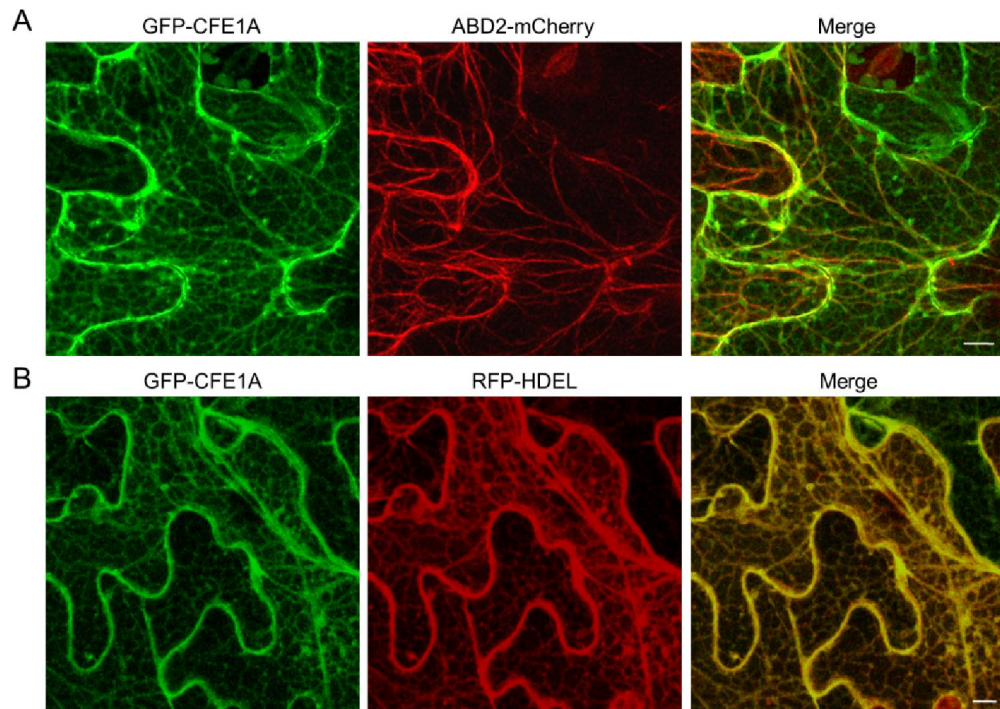

**Supplementary Fig. S6.** GhCFE1A locates on cortical endoplasmic reticulum (ER) and colocalizes with actin bundles.

(A) GFP-CFE1A co-expressed with an actin filaments marker, ABD2-mCherry in tobacco (*Nicotiana benthamiana*) leaf epidermal cells. Scale bar = 10  $\mu\text{m}$ .

(B) GFP-CFE1A co-expressed with an ER luminal marker, RFP-HDEL in tobacco leaf epidermal cells. Scale bar = 10  $\mu\text{m}$ .

**Supplementary Table S1.** Oligonucleotides used in this study.

| Primer Name                           | Sequences(5'-3')                 | Underline<br>d | Destination                                     |
|---------------------------------------|----------------------------------|----------------|-------------------------------------------------|
| <i>CFE1</i> - full-F                  | CCCCTTACCTTCATAGAGAG             |                | <i>CFE1</i> gene cloning                        |
| <i>CFE1</i> - full-R                  | TGAGGGTTATGGCAGAAGAT             |                |                                                 |
| <i>GhCFE1D</i> -SNP-F                 | TGTGGAGTATGATACAAAGAGCGGGTGGTA   |                | molecular mapping                               |
| <i>GhCFE1D</i> -SNP-R                 | TTTGTTAAAGAGATTCGATACAGAGGCCGAA  |                |                                                 |
| <i>GhCFE1</i> -qRT-F                  | GACGCTGGAAAACACTTGGAAA           |                | qRT-PCR                                         |
| <i>GhCFE1</i> -qRT-R                  | GACTCAGCGACGGTCTTTTCT            |                |                                                 |
| <i>His3</i> -qRT-F                    | GGTGGTGTGAAGAAGCCTCAT            |                | qRT-PCR                                         |
| <i>His3</i> -qRT-R                    | AATTCACGAACAAGCCTCTGGAA          |                |                                                 |
| <i>GhCFE1</i> -RT-F                   | TGTGGCGGTTAAAGATG                |                | RT-PCR and southern<br>blot probe               |
| <i>GhCFE1</i> -RT-R                   | GACTCAGCGACGGTTC                 |                |                                                 |
| EF-1 F                                | AGACCACCAAGTACTACTGCAC           |                | RT-PCR                                          |
| EF-1 R                                | CCACCAATCTTGACACATCC             |                |                                                 |
| <i>GhCFE1A</i><br>pET-30a/pGEX-6P-1-F | GCGGATCCCTTAAAATCTCTGTTCCATTGGTT | <i>Bam</i> HI  | Heterologous<br>expression of<br><i>GhCFE1A</i> |
| <i>GhCFE1A</i>                        | CGCTCGAGCTAACTTCCACGGTCAACC      | <i>Xho</i> I   |                                                 |



pET-30a/pGEX-6P-1-R

|                              |                               |               |                                               |
|------------------------------|-------------------------------|---------------|-----------------------------------------------|
| OE- <i>GhCFE1A</i> -F        | GCCGGATCCACCCCTTACCTTCATAGAG  | <i>Bam</i> HI | Overexpression                                |
| OE- <i>GhCFE1A</i> -R        | TCCGAGCTCGCAGAAGATATTGGTCTAT  | <i>Sac</i> I  | Vector                                        |
| Knockdown- <i>GhCFE1A</i> -F | TCCGAGCTCACCCCTTACCTTCATAGAG  | <i>Sac</i> I  | Suppression Vector                            |
| Knockdown- <i>GhCFE1A</i> -R | CGCGGATCCGCAGAAGATATTGGTCTAT  | <i>Bam</i> HI |                                               |
| 35SSC-F                      | TGCCATCATTGCGATAAA            |               | <i>35S</i> -sense <i>GhCFE1A</i> detection    |
| 35SSC-R                      | CTGACTCAGCGACGGTTC            |               |                                               |
| E6SC-F                       | CCATTCACCACTTGCTCCT           |               | <i>E6</i> -sense <i>GhCFE1A</i> detection     |
| E6SC-R                       | GGCATTGATTTCCCTTCC            |               |                                               |
| E6ASC-F                      | TATTGGTGTAATGTGAAGGGAC        |               | <i>E6</i> -antisense <i>GhCFE1A</i> detection |
| E6ASC-R                      | CAAAGAGCGGGTGGGACT            |               |                                               |
| <i>NPTII</i> -F              | GAGGCTATTCGGCTATGACTG         |               | <i>NPTII</i> detection                        |
| <i>NPTII</i> -R              | TAGAAGGCGATGCGCTGCGA          |               |                                               |
| <i>GhCFE1A</i> BKT7-F        | GGAATTCATATGCTTAAAATCTCTGTTCC | <i>Nde</i> I  | bait vector construction                      |
| <i>GhCFE1A</i> BKT7-R        | AACTGCAGGACTTCCACGGTCAACCATTT | <i>Pst</i> I  |                                               |
| BD- C-F                      | GGAATTCATATGCTTAAAATCTCTGTTCC | <i>Nde</i> I  | _____                                         |
| BD- C-R                      | AACTGCAGGCAGCGACGGTTCTTTTCTCA | <i>Pst</i> I  |                                               |

|                      |                                     |                |                                     |
|----------------------|-------------------------------------|----------------|-------------------------------------|
| BD- N-F              | GGAATTCCATATGAACCAAAACAACGGCGAG     | <i>Nde</i> I   |                                     |
| BD- N-R              | AACTGCAGGACTTCCACGGTCAACCATT        | <i>Pst</i> I   |                                     |
| <i>GhACT2</i> -F     | CTCTGAAGCTCCTCTTGGTTCT              |                | <i>GhACT2</i> gene cloning          |
| <i>GhACT2</i> -R     | GGTGATACGGTGAAAGGCTAA               |                |                                     |
| <i>GhACTa</i> SNP-F  | ATTTACTCAGTATTGTAAAAGATGGCCGACGG    |                | <i>GhACTa</i> gene cloning          |
| <i>GhACTa</i> SNP -R | CCCCACATAAACCAGACTTTTGAGTTGAC       |                |                                     |
| <i>GhACTb</i> SNP-F  | ATTTACTCAGTATTGTAAAAGATGGCCGACGG    |                | <i>GhACTb</i> gene cloning          |
| <i>GhACTb</i> SNP-R  | ATGCAAAATGTAGATCACCATCAAAGCAAGTAC   |                |                                     |
| <i>GhACT4</i> SNP-F  | TTGTAAAAGATGGCCGATGCTGAGGATA        |                | <i>GhACT4</i> gene cloning          |
| <i>GhACT4</i> SNP-R  | CAGAAAATGTAACTCACCATTAAATGACTTGTCAT |                |                                     |
| <i>GhACTADT7</i> -F1 | GGAATTCCATATGGCCGACGGTGAGGAT        | <i>Nde</i> I   | pGADT7-GhACT<br>vector construction |
| <i>GhACTADT7</i> -F2 | GAATTCCATATGGCCGATGCTGAGGAT         | <i>Nde</i> I   |                                     |
| <i>GhACTADT7</i> -R  | CGGGATCCCGAAGCACTTCCTGTGGAC         | <i>Bam</i> H I |                                     |
| CFE1A-GFP-F          | caccATGGCGACGGCGAGTACTTGGATAT       |                | CFE1A-GFP                           |
| CFE1A-GFP-R          | tgctctgetccACTTCCACGGTCAACCATT      |                | vector construction                 |
| GFP-CFE1A-F          | caccATGGCGACGGCGAGTACTTGGATAT       |                | GFP-CFE1A                           |
| GFP-CFE1A-R          | CTAACTTCCACGGTCAACCATTTCCATGT       |                | vector construction                 |
| <i>MYB2</i> -F       | TTGCTTTAGTTTGGATTGGGTG              |                | qRT-PCR                             |
| <i>MYB2</i> -R       | CCAAGAAACATTTGGTTATAGCC             |                |                                     |

---

|                 |                          |         |
|-----------------|--------------------------|---------|
| <i>MYB25-F</i>  | ATGGCAAGGTGTCGTCTG       |         |
| <i>MYB25-R</i>  | GGCAATGTTGTGGTGTCTC      | qRT-PCR |
| <i>MYB109-F</i> | GGAGGAAGACAAGTTACTCATTGA |         |
| <i>MYB109-R</i> | CATCCACCTTAGCCGACAA      | qRT-PCR |
| <i>TTG3-F</i>   | TCCGCTTCATCCTCTTCT       |         |
| <i>TTG3-R</i>   | ACAGTGACAGGTTCAATGG      | qRT-PCR |
| <i>HOX1-F</i>   | ACACCTTGAGTGCCAGAA       |         |
| <i>HOX1-R</i>   | ATGTTGTAATGTTGCCATCCA    | qRT-PCR |

---

**Supplementary Table S2.** Statistics of lint and fuzz physical parameters of 35SSC, E6SC, and E6ASC transgenic lines.

| Lines | Vector | Lint index/g | Fuzz index/g | NLFI           | NFFI        |
|-------|--------|--------------|--------------|----------------|-------------|
| W0    |        | 5.60±0.29    | 1.45±0.09    | 219.33±23.32   | 14.45±5.92  |
| 155   | 35SSC  | 4.79±0.62*   | 0.99±0.15*   | 161.50±19.80** | 7.05±2.09** |
| 158   | 35SSC  | 5.08±0.11    | 1.10±0.13    | 170.53±23.30** | 8.45±3.28** |
| 159   | 35SSC  | 4.55±0.27*   | 0.98±0.04*   | 153.11±19.37** | 6.42±2.32** |
| 164   | 35SSC  | 4.68±0.27*   | 1.08±0.10    | 167.60±23.05** | 7.95±3.56** |
| 169   | E6SC   | 5.89±0.38    | 1.23±0.05    | 194.33±21.38*  | 10.42±2.99* |
| 172   | E6SC   | 5.69±0.69    | 1.26±0.02    | 209.70±19.39   | 10.74±2.94* |
| 178   | E6SC   | 5.91±0.14    | 1.19±0.01    | 212.65±19.92   | 12.50±4.41  |
| 181   | E6SC   | 5.80±0.40    | 1.13±0.33    | 189.67±21.06*  | 11.07±6.36* |
| 183   | E6SC   | 5.66±0.41    | 1.31±0.08    | 197.50±23.57*  | 10.95±3.29* |
| 186   | E6ASC  | 6.41±0.35    | 1.63±0.08    | 223.59±26.38   | 16.50±5.49  |
| 189   | E6ASC  | 5.80±0.64    | 1.51±0.11    | 213.76±21.43   | 14.65±4.37  |
| 191   | E6ASC  | 5.62±0.53    | 1.59±0.03    | 219.05±26.33   | 14.70±4.22  |
| 194   | E6ASC  | 6.55±0.13    | 1.69±0.08    | 226.21±23.00   | 16.64±6.44  |
| 197   | E6ASC  | 5.98±0.97    | 1.49±0.22    | 218.26±28.97   | 15.35±5.64  |
| 199   | E6ASC  | 6.85±0.73    | 1.70±0.18    | 227.65±37.99   | 16.79±5.09  |

Fiber samples were harvested from field-grown T3 transgenic cotton plants and wild-type cotton plants for measurement. Values of lint index and fuzz index are mean ± standard deviation of assays for samples of three individual repeats from each line. The number of lint fiber and fuzz fiber initials (NLFI and NFFI) was counted from scanning electron microscope (SEM) images (250 μm × 170 μm) of the central portion of ovules at 0 and 4 days post-anthesis (DPA). The values were averaged over 20 images of 10 selected ovules. Asterisks indicate statistically significant differences between transgenic lines and wild-type plants, as determined by the Student's *t* test (\**P* < 0.05; \*\**P* < 0.01). WT, wild type; 35SSC, *35S*-sense-*GhCFE1A* expression vector; E6SC, *E6*-sense-*GhCFE1A* expression vector; E6ASC, *E6*-antisense-*GhCFE1A* expression vector.

**Supplementary Table S3.** Comparison of fiber quality parameters between transgenic lines and null control or wild-type plants.

| Lines  | Vector | Length(mm)   | Strength<br>(cN·tex <sup>-1</sup> ) | Micronaire |
|--------|--------|--------------|-------------------------------------|------------|
| WT     |        | 27.58±0.43   | 29.42±1.94                          | 5.69±0.60  |
| pBI121 | pBI121 | 27.67±1.13   | 28.23±0.40                          | 5.23±0.12  |
| 155    | 35SSC  | 26.47±0.37** | 28.65±2.51                          | 5.58±0.34  |
| 158    | 35SSC  | 26.28±1.31** | 29.46±4.07                          | 5.89±0.50  |
| 159    | 35SSC  | 24.90±0.90** | 28.07±2.90                          | 5.58±1.00  |
| 164    | 35SSC  | 26.49±0.59** | 28.45±1.91                          | 5.60±0.52  |
| 169    | E6SC   | 26.84±0.80*  | 28.82±2.57                          | 5.67±0.65  |
| 172    | E6SC   | 27.04±1.50   | 29.22±2.40                          | 5.66±0.23  |
| 178    | E6SC   | 27.64±1.13   | 29.17±2.88                          | 5.77±0.38  |
| 181    | E6SC   | 26.65±0.51*  | 28.84±1.87                          | 5.86±0.62  |
| 183    | E6SC   | 26.70±0.60*  | 27.87±1.58                          | 6.05±0.73  |
| 186    | E6ASC  | 28.06±1.23   | 30.82±2.42                          | 5.86±0.70  |
| 189    | E6ASC  | 27.51±0.72   | 28.91±2.38                          | 5.35±0.43  |
| 191    | E6ASC  | 27.84±1.43   | 28.32±2.46                          | 5.37±0.44  |
| 194    | E6ASC  | 27.86±0.80   | 29.69±2.68                          | 5.56±0.66  |
| 197    | E6ASC  | 27.88±0.79   | 29.09±1.50                          | 5.76±0.57  |
| 199    | E6ASC  | 27.94±0.37   | 28.79±2.73                          | 5.89±0.52  |

Fiber samples were harvested from field-grown T3 transgenic cotton, wild-type and null control plants for measurement. Values are mean ± standard deviation of assays for samples of three individual repeats from each line. WT, wild type; pBI121, empty expression vector; 35SSC, *35S*-sense-*GhCFE1A* expression vector; E6SC, *E6*-sense-*GhCFE1A* expression vector; E6ASC, *E6*-antisense-*GhCFE1A* expression vector. Asterisks indicate statistically significant differences between transgenic lines and null control or wild-type plants, as determined by the Student's *t*-test (\**P* < 0.05; \*\**P* < 0.01).

**Supplementary Table S4.** Clones identified by yeast two-hybrid library screening.

| Clone | Length | Conserved domains                                | Homologous protein                                                  | Accession number | E-Value | Homology <sup>a</sup> |
|-------|--------|--------------------------------------------------|---------------------------------------------------------------------|------------------|---------|-----------------------|
| 1     | 234 aa | ACTIN                                            | actin [ <i>Gossypium hirsutum</i> ]                                 | AAP73449         | 1e-167  | Id=99%;<br>Po=99%     |
| 2     | 144 aa | DAP-epimerase                                    | Diaminopimelate epimerase, putative [ <i>Ricinus communis</i> ]     | XP_002533003     | 6e-85   | Id=84%;<br>Po=93%     |
| 3     | 104 aa | cyanin_plasto                                    | plastocyanin precursor [ <i>Hordeum vulgare</i> ]                   | CAA68696         | 1e-68   | Id=99%;<br>Po=100%    |
| 4     | 102 aa | No putative conserved domains have been detected | hypothetical protein OsI_22798 [ <i>Oryza sativa Indica Group</i> ] | EEC80521         | 0.016   | Id=54%;<br>Po=57%     |
| 5     | 83 aa  | No putative conserved domains have been detected | None                                                                |                  |         |                       |
| 6     | 69 aa  | No putative conserved domains have been detected | None                                                                |                  |         |                       |
